# Supplementary material for: Role of Maternal Diet in the Risk of Childhood Acute Leukemia: A Systematic Review and Meta-Analysis
Source: MDPI journal article supplement (doi:10.3390/ijerph20075428), 2023-04-06
Supplement: s1 [file s1]

**Supplementary table S2. Quality assessment of the studies included into the systematic review evaluated by the checklist proposed by Fowkes et al.**

| Reference                | Study design appropriate to objectives | Study sample representative |                        |                    |                        |                                 | Control group acceptable      |                           |                               |                                   | Quality of measurements and outcome |                        |                  |                        | Completeness      |                 |               |                     | Distorting influences        |                      |                          |                            |                                       |
|--------------------------|----------------------------------------|-----------------------------|------------------------|--------------------|------------------------|---------------------------------|-------------------------------|---------------------------|-------------------------------|-----------------------------------|-------------------------------------|------------------------|------------------|------------------------|-------------------|-----------------|---------------|---------------------|------------------------------|----------------------|--------------------------|----------------------------|---------------------------------------|
|                          | <i>Objective: Cause</i>                | <i>Source of sample</i>     | <i>Sampling method</i> | <i>Sample size</i> | <i>Non respondents</i> | <i>Entry criteria/exclusion</i> | <i>Definition of controls</i> | <i>Source of controls</i> | <i>Matching/randomization</i> | <i>Comparable characteristics</i> | <i>Validity</i>                     | <i>Reproducibility</i> | <i>Blindness</i> | <i>Quality control</i> | <i>Compliance</i> | <i>Dropouts</i> | <i>Deaths</i> | <i>Missing data</i> | <i>Extraneous treatments</i> | <i>Contamination</i> | <i>Changes over time</i> | <i>Confounding factors</i> | <i>Distortion reduced by analysis</i> |
| Abudaowd et al., 2021    | 0                                      | 0                           | 0                      | 0                  | +                      | 0                               | 0                             | 0                         | 0                             | 0                                 | 0                                   | NA                     | NA               | NA                     | NA                | NA              | NA            | 0                   | NA                           | NA                   | NA                       | +                          | 0                                     |
| Ajrouché et al., 2014    | 0                                      | 0                           | 0                      | 0                  | 0                      | 0                               | 0                             | 0                         | 0                             | 0                                 | 0                                   | NA                     | NA               | NA                     | NA                | NA              | NA            | 0                   | NA                           | NA                   | NA                       | +                          | 0                                     |
| Amigou et al., 2012      | 0                                      | 0                           | 0                      | 0                  | 0                      | 0                               | 0                             | 0                         | 0                             | 0                                 | 0                                   | NA                     | NA               | NA                     | NA                | NA              | NA            | 0                   | NA                           | NA                   | NA                       | +                          | 0                                     |
| Bailey et al., 2012      | 0                                      | 0                           | 0                      | 0                  | 0                      | 0                               | 0                             | 0                         | 0                             | 0                                 | 0                                   | NA                     | NA               | NA                     | NA                | NA              | NA            | 0                   | NA                           | NA                   | NA                       | +                          | 0                                     |
| Bonaventure et al., 2013 | 0                                      | 0                           | 0                      | 0                  | 0                      | 0                               | 0                             | 0                         | 0                             | 0                                 | 0                                   | NA                     | NA               | NA                     | NA                | NA              | NA            | 0                   | NA                           | NA                   | NA                       | +                          | 0                                     |
| Bonaventure et al., 2015 | 0                                      | 0                           | 0                      | 0                  | 0                      | 0                               | 0                             | 0                         | 0                             | 0                                 | 0                                   | NA                     | NA               | NA                     | NA                | NA              | NA            | 0                   | NA                           | NA                   | NA                       | +                          | 0                                     |
| Clavel et al., 2005      | 0                                      | 0                           | 0                      | 0                  | 0                      | 0                               | 0                             | 0                         | 0                             | 0                                 | 0                                   | NA                     | NA               | NA                     | NA                | NA              | NA            | 0                   | NA                           | NA                   | NA                       | +                          | 0                                     |
| Dockerty et al., 2007    | 0                                      | 0                           | 0                      | 0                  | +                      | 0                               | 0                             | 0                         | 0                             | 0                                 | 0                                   | NA                     | NA               | NA                     | NA                | NA              | NA            | 0                   | NA                           | NA                   | NA                       | +                          | 0                                     |
| Jensen et al., 2004      | 0                                      | 0                           | 0                      | 0                  | 0                      | 0                               | 0                             | 0                         | 0                             | +                                 | 0                                   | NA                     | NA               | NA                     | NA                | NA              | NA            | 0                   | NA                           | NA                   | NA                       | +                          | 0                                     |
| Karalexy et al., 2019    | 0                                      | 0                           | 0                      | 0                  | 0                      | 0                               | 0                             | 0                         | 0                             | 0                                 | 0                                   | NA                     | NA               | NA                     | NA                | NA              | NA            | 0                   | NA                           | NA                   | NA                       | 0                          | 0                                     |
| Kwan et al., 2006        | 0                                      | 0                           | 0                      | 0                  | 0                      | 0                               | 0                             | 0                         | 0                             | 0                                 | 0                                   | NA                     | NA               | NA                     | NA                | NA              | NA            | 0                   | NA                           | NA                   | NA                       | +                          | 0                                     |
| Kwan et al., 2009        | 0                                      | 0                           | 0                      | 0                  | 0                      | 0                               | 0                             | 0                         | 0                             | 0                                 | 0                                   | NA                     | NA               | NA                     | NA                | NA              | NA            | 0                   | NA                           | NA                   | NA                       | +                          | 0                                     |
| Linabery et al., 2010    | 0                                      | 0                           | 0                      | 0                  | +                      | 0                               | 0                             | 0                         | 0                             | 0                                 | +                                   | NA                     | NA               | NA                     | NA                | NA              | NA            | 0                   | NA                           | NA                   | NA                       | +                          | 0                                     |
| Madsen et al., 2020      | 0                                      | 0                           | NA                     | NA                 | NA                     | 0                               | NA                            | NA                        | NA                            | NA                                | 0                                   | NA                     | NA               | NA                     | NA                | NA              | NA            | 0                   | NA                           | NA                   | NA                       | 0                          | 0                                     |
| McKinney et al., 1999    | 0                                      | 0                           | 0                      | 0                  | 0                      | 0                               | 0                             | 0                         | 0                             | 0                                 | 0                                   | NA                     | NA               | NA                     | NA                | NA              | NA            | 0                   | NA                           | NA                   | NA                       | +                          | 0                                     |
| Menegaux et al., 2005    | 0                                      | 0                           | 0                      | 0                  | 0                      | 0                               | 0                             | 0                         | 0                             | 0                                 | 0                                   | NA                     | NA               | NA                     | NA                | NA              | NA            | 0                   | NA                           | NA                   | NA                       | +                          | 0                                     |
| Menegaux et al., 2007    | 0                                      | 0                           | 0                      | 0                  | 0                      | 0                               | 0                             | 0                         | 0                             | 0                                 | +                                   | NA                     | NA               | NA                     | NA                | NA              | NA            | 0                   | NA                           | NA                   | NA                       | +                          | 0                                     |
| Metayer et al., 2014     | 0                                      | 0                           | 0                      | 0                  | 0                      | 0                               | 0                             | 0                         | 0                             | 0                                 | 0                                   | NA                     | NA               | NA                     | NA                | NA              | NA            | 0                   | NA                           | NA                   | NA                       | 0                          | 0                                     |
| Milne et al., 2010       | 0                                      | 0                           | 0                      | 0                  | 0                      | 0                               | 0                             | 0                         | 0                             | 0                                 | 0                                   | NA                     | NA               | NA                     | NA                | NA              | NA            | 0                   | NA                           | NA                   | NA                       | +                          | 0                                     |
| Milne et al., 2011       | 0                                      | 0                           | 0                      | 0                  | 0                      | 0                               | 0                             | 0                         | 0                             | 0                                 | 0                                   | NA                     | NA               | NA                     | NA                | NA              | NA            | 0                   | NA                           | NA                   | NA                       | +                          | 0                                     |

| Reference                      | Study design appropriate to objectives | Study sample representative |                        |                    |                        |                                 | Control group acceptable      |                           |                               |                                   | Quality of measurements and outcome |                        |                  |                        | Completeness      |                 |               |                     | Distorting influences        |                      |                          |                            |                                       |
|--------------------------------|----------------------------------------|-----------------------------|------------------------|--------------------|------------------------|---------------------------------|-------------------------------|---------------------------|-------------------------------|-----------------------------------|-------------------------------------|------------------------|------------------|------------------------|-------------------|-----------------|---------------|---------------------|------------------------------|----------------------|--------------------------|----------------------------|---------------------------------------|
|                                | <i>Objective: Cause</i>                | <i>Source of sample</i>     | <i>Sampling method</i> | <i>Sample size</i> | <i>Non respondents</i> | <i>Entry criteria/exclusion</i> | <i>Definition of controls</i> | <i>Source of controls</i> | <i>Matching/randomization</i> | <i>Comparable characteristics</i> | <i>Validity</i>                     | <i>Reproducibility</i> | <i>Blindness</i> | <i>Quality control</i> | <i>Compliance</i> | <i>Dropouts</i> | <i>Deaths</i> | <i>Missing data</i> | <i>Extraneous treatments</i> | <i>Contamination</i> | <i>Changes over time</i> | <i>Confounding factors</i> | <i>Distortion reduced by analysis</i> |
| Milne et al., 2018             | 0                                      | 0                           | 0                      | 0                  | 0                      | 0                               | 0                             | 0                         | 0                             | 0                                 | 0                                   | NA                     | NA               | NA                     | NA                | NA              | NA            | 0                   | NA                           | NA                   | NA                       | 0                          | 0                                     |
| Ognjanovic et al., 2011        | 0                                      | 0                           | 0                      | 0                  | +                      | 0                               | 0                             | 0                         | 0                             | 0                                 | +                                   | NA                     | NA               | NA                     | NA                | NA              | NA            | 0                   | NA                           | NA                   | NA                       | +                          | 0                                     |
| Orsi et al., 2015              | 0                                      | 0                           | 0                      | 0                  | 0                      | 0                               | 0                             | 0                         | 0                             | 0                                 | 0                                   | NA                     | NA               | NA                     | NA                | NA              | NA            | 0                   | NA                           | NA                   | NA                       | +                          | 0                                     |
| Peters et al., 1994            | 0                                      | 0                           | 0                      | 0                  | 0                      | 0                               | 0                             | 0                         | 0                             | 0                                 | 0                                   | NA                     | NA               | NA                     | NA                | NA              | NA            | 0                   | NA                           | NA                   | NA                       | +                          | 0                                     |
| Petridou et al., 1997          | 0                                      | 0                           | 0                      | 0                  | 0                      | 0                               | 0                             | +                         | 0                             | 0                                 | 0                                   | NA                     | NA               | NA                     | NA                | NA              | NA            | 0                   | NA                           | NA                   | NA                       | +                          | 0                                     |
| Petridou et al., 2005          | 0                                      | 0                           | 0                      | 0                  | 0                      | 0                               | 0                             | +                         | 0                             | 0                                 | 0                                   | NA                     | NA               | NA                     | NA                | NA              | NA            | 0                   | NA                           | NA                   | NA                       | +                          | 0                                     |
| Robison et al., 1989           | 0                                      | 0                           | 0                      | 0                  | 0                      | 0                               | 0                             | 0                         | 0                             | 0                                 | 0                                   | NA                     | NA               | NA                     | NA                | NA              | NA            | 0                   | NA                           | NA                   | NA                       | +                          | 0                                     |
| Ross et al., 1996              | 0                                      | 0                           | 0                      | 0                  | 0                      | 0                               | 0                             | 0                         | 0                             | 0                                 | 0                                   | NA                     | NA               | NA                     | NA                | NA              | NA            | 0                   | NA                           | NA                   | NA                       | +                          | 0                                     |
| Sarasua et al., 1993           | 0                                      | 0                           | 0                      | ++                 | 0                      | 0                               | 0                             | 0                         | 0                             | 0                                 | 0                                   | NA                     | NA               | NA                     | NA                | NA              | NA            | 0                   | NA                           | NA                   | NA                       | +                          | 0                                     |
| Schuz et al., 2007             | 0                                      | 0                           | 0                      | 0                  | 0                      | 0                               | 0                             | 0                         | 0                             | 0                                 | +                                   | NA                     | NA               | NA                     | NA                | NA              | NA            | 0                   | NA                           | NA                   | NA                       | +                          | 0                                     |
| Shaw et al., 2004              | 0                                      | 0                           | 0                      | 0                  | 0                      | 0                               | 0                             | 0                         | 0                             | 0                                 | +                                   | NA                     | NA               | NA                     | NA                | NA              | NA            | 0                   | NA                           | NA                   | NA                       | +                          | 0                                     |
| Singer et al., 2016            | 0                                      | 0                           | 0                      | 0                  | 0                      | 0                               | 0                             | 0                         | 0                             | 0                                 | 0                                   | NA                     | NA               | NA                     | NA                | NA              | NA            | 0                   | NA                           | NA                   | NA                       | +                          | 0                                     |
| Singer et al., 2016            | 0                                      | 0                           | 0                      | 0                  | 0                      | 0                               | 0                             | 0                         | 0                             | 0                                 | 0                                   | NA                     | NA               | NA                     | NA                | NA              | NA            | 0                   | NA                           | NA                   | NA                       | +                          | 0                                     |
| Thompson et al., 2001          | 0                                      | 0                           | 0                      | 0                  | 0                      | 0                               | 0                             | 0                         | 0                             | 0                                 | 0                                   | NA                     | NA               | NA                     | NA                | NA              | NA            | 0                   | NA                           | NA                   | NA                       | +                          | 0                                     |
| Van Steensel-Moll et al., 1985 | 0                                      | 0                           | 0                      | 0                  | 0                      | 0                               | 0                             | 0                         | 0                             | 0                                 | 0                                   | NA                     | NA               | NA                     | NA                | NA              | NA            | 0                   | NA                           | NA                   | NA                       | +                          | 0                                     |
| Wen et al., 2002               | 0                                      | 0                           | 0                      | 0                  | 0                      | 0                               | 0                             | 0                         | 0                             | +                                 | +                                   | NA                     | NA               | NA                     | NA                | NA              | NA            | 0                   | NA                           | NA                   | NA                       | +                          | 0                                     |

Legend: 0=no flaw, +=minor flaw, ++=major flaw, NA= Not applicable.
